# Supplementary material
Source: PubMed Central journal article supplement (PMC5026900)
Supplement: NIHMS792732-supplement-40273_2016_408_MOESM1_ESM.pdf [file NIHMS792732-supplement-40273_2016_408_MOESM1_ESM.pdf]

## PROMIS–29 Profile v2.0

Please respond to each question or statement by marking one box per row.

| <b><u>Physical Function</u></b>  |                                                                  | <b>Without any difficulty</b> | <b>With a little difficulty</b> | <b>With some difficulty</b> | <b>With much difficulty</b> | <b>Unable to do</b>      |
|----------------------------------|------------------------------------------------------------------|-------------------------------|---------------------------------|-----------------------------|-----------------------------|--------------------------|
| 1                                | Are you able to do chores such as vacuuming or yard work? .....  | <input type="checkbox"/>      | <input type="checkbox"/>        | <input type="checkbox"/>    | <input type="checkbox"/>    | <input type="checkbox"/> |
| 2                                | Are you able to go up and down stairs at a normal pace? .....    | <input type="checkbox"/>      | <input type="checkbox"/>        | <input type="checkbox"/>    | <input type="checkbox"/>    | <input type="checkbox"/> |
| 3                                | Are you able to go for a walk of at least 15 minutes? .....      | <input type="checkbox"/>      | <input type="checkbox"/>        | <input type="checkbox"/>    | <input type="checkbox"/>    | <input type="checkbox"/> |
| 4                                | Are you able to run errands and shop? .....                      | <input type="checkbox"/>      | <input type="checkbox"/>        | <input type="checkbox"/>    | <input type="checkbox"/>    | <input type="checkbox"/> |
| <b><u>Anxiety</u></b>            |                                                                  | <b>Never</b>                  | <b>Rarely</b>                   | <b>Sometimes</b>            | <b>Often</b>                | <b>Always</b>            |
| <b>In the past 7 days...</b>     |                                                                  |                               |                                 |                             |                             |                          |
| 5                                | I felt fearful .....                                             | <input type="checkbox"/>      | <input type="checkbox"/>        | <input type="checkbox"/>    | <input type="checkbox"/>    | <input type="checkbox"/> |
| 6                                | I found it hard to focus on anything other than my anxiety ..... | <input type="checkbox"/>      | <input type="checkbox"/>        | <input type="checkbox"/>    | <input type="checkbox"/>    | <input type="checkbox"/> |
| 7                                | My worries overwhelmed me .....                                  | <input type="checkbox"/>      | <input type="checkbox"/>        | <input type="checkbox"/>    | <input type="checkbox"/>    | <input type="checkbox"/> |
| 8                                | I felt uneasy .....                                              | <input type="checkbox"/>      | <input type="checkbox"/>        | <input type="checkbox"/>    | <input type="checkbox"/>    | <input type="checkbox"/> |
| <b><u>Depression</u></b>         |                                                                  | <b>Never</b>                  | <b>Rarely</b>                   | <b>Sometimes</b>            | <b>Often</b>                | <b>Always</b>            |
| <b>In the past 7 days...</b>     |                                                                  |                               |                                 |                             |                             |                          |
| 9                                | I felt worthless .....                                           | <input type="checkbox"/>      | <input type="checkbox"/>        | <input type="checkbox"/>    | <input type="checkbox"/>    | <input type="checkbox"/> |
| 10                               | I felt helpless.....                                             | <input type="checkbox"/>      | <input type="checkbox"/>        | <input type="checkbox"/>    | <input type="checkbox"/>    | <input type="checkbox"/> |
| 11                               | I felt depressed.....                                            | <input type="checkbox"/>      | <input type="checkbox"/>        | <input type="checkbox"/>    | <input type="checkbox"/>    | <input type="checkbox"/> |
| 12                               | I felt hopeless.....                                             | <input type="checkbox"/>      | <input type="checkbox"/>        | <input type="checkbox"/>    | <input type="checkbox"/>    | <input type="checkbox"/> |
| <b><u>Fatigue</u></b>            |                                                                  | <b>Not at all</b>             | <b>A little bit</b>             | <b>Somewhat</b>             | <b>Quite a bit</b>          | <b>Very much</b>         |
| <b>During the past 7 days...</b> |                                                                  |                               |                                 |                             |                             |                          |
| 13                               | I feel fatigued .....                                            | <input type="checkbox"/>      | <input type="checkbox"/>        | <input type="checkbox"/>    | <input type="checkbox"/>    | <input type="checkbox"/> |
| 14                               | I have trouble <u>starting</u> things because I am tired.....    | <input type="checkbox"/>      | <input type="checkbox"/>        | <input type="checkbox"/>    | <input type="checkbox"/>    | <input type="checkbox"/> |

## PROMIS–29 Profile v2.0

### **Fatigue**

**In the past 7 days...**

**Not at all    A little bit    Somewhat    Quite a bit    Very much**

|    |                                           |                          |                          |                          |                          |                          |
|----|-------------------------------------------|--------------------------|--------------------------|--------------------------|--------------------------|--------------------------|
| 15 | How run-down did you feel on average? ... | <input type="checkbox"/> |
| 16 | How fatigued were you on average? .....   | <input type="checkbox"/> |

### **Sleep Disturbance**

**In the past 7 days...**

**Very poor    Poor    Fair    Good    Very good**

|    |                            |                          |                          |                          |                          |                          |
|----|----------------------------|--------------------------|--------------------------|--------------------------|--------------------------|--------------------------|
| 17 | My sleep quality was ..... | <input type="checkbox"/> |
|----|----------------------------|--------------------------|--------------------------|--------------------------|--------------------------|--------------------------|

**In the past 7 days...**

**Not at all    A little bit    Somewhat    Quite a bit    Very much**

|    |                                       |                          |                          |                          |                          |                          |
|----|---------------------------------------|--------------------------|--------------------------|--------------------------|--------------------------|--------------------------|
| 18 | My sleep was refreshing.....          | <input type="checkbox"/> |
| 19 | I had a problem with my sleep .....   | <input type="checkbox"/> |
| 20 | I had difficulty falling asleep ..... | <input type="checkbox"/> |

### **Ability to Participate in Social Roles and Activities**

**Never    Rarely    Sometimes    Usually    Always**

|    |                                                                                 |                          |                          |                          |                          |                          |
|----|---------------------------------------------------------------------------------|--------------------------|--------------------------|--------------------------|--------------------------|--------------------------|
| 21 | I have trouble doing all of my regular leisure activities with others .....     | <input type="checkbox"/> |
| 22 | I have trouble doing all of the family activities that I want to do .....       | <input type="checkbox"/> |
| 23 | I have trouble doing all of my usual work (include work at home) .....          | <input type="checkbox"/> |
| 24 | I have trouble doing all of the activities with friends that I want to do ..... | <input type="checkbox"/> |

### **Pain Interference**

**In the past 7 days...**

**Not at all    A little bit    Somewhat    Quite a bit    Very much**

|    |                                                                                      |                          |                          |                          |                          |                          |
|----|--------------------------------------------------------------------------------------|--------------------------|--------------------------|--------------------------|--------------------------|--------------------------|
| 25 | How much did pain interfere with your day to day activities? .....                   | <input type="checkbox"/> |
| 26 | How much did pain interfere with work around the home? .....                         | <input type="checkbox"/> |
| 27 | How much did pain interfere with your ability to participate in social activities? . | <input type="checkbox"/> |
| 28 | How much did pain interfere with your household chores? .....                        | <input type="checkbox"/> |

# PROMIS-29 Profile v2.0

## Pain Intensity

### In the past 7 days...

29

How would you rate your pain on average?.....

0  
No  
pain

1

2

3

4

5

6

7

8

9

10

Worst  
imaginable  
pain
